# Supplementary material for: Extending the high-performing boundaries of a fully bio-based thermal shrinkage film targeted for food packaging applications
Source: Royal Society of Chemistry journal article supplement (doi:10.1039/d3gc02193a), 2023-01-01
Supplement: d3gc02193a1.pdf [file d3gc02193a1.pdf]

# Electronic Supplementary Information

## Extending the high-performing boundaries of fully bio-based thermal shrinkage film targeted for food packaging applications

A-Yeon Lim,<sup>a,b,†</sup> Sung bae Park,<sup>a,†</sup> Yumi Choi,<sup>a,b</sup> Dongyeop X. Oh,<sup>a,c,d,\*</sup> Jeyoung Park,<sup>a,e,\*</sup>  
Hyeonyeol Jeon,<sup>a,c,\*</sup> and Jun Mo Koo<sup>f,\*</sup>

*<sup>a</sup>Research Center for Bio-based Chemistry, Korea Research Institute of Chemical  
Technology (KRICT), Ulsan 44429, Republic of Korea. E-mail: dongyeop@kRICT.re.kr,  
hyjeon@kRICT.re.kr*

*<sup>b</sup>School of Chemical Engineering, Pusan National University (PNU), Busan 46421, Republic  
of Korea.*

*<sup>c</sup>Advanced Materials and Chemical Engineering, University of Science and Technology  
(UST), Daejeon 34113, Republic of Korea.*

*<sup>d</sup>Department of Polymer Science and Engineering and Program in Environmental and  
Polymer Engineering, Inha University, Incheon 22212, Republic of Korea. E-mail:  
d.oh@inha.ac.kr*

*<sup>e</sup>Department of Chemical and Biomolecular Engineering, Sogang University, Seoul 04107,  
Republic of Korea. E-mail: jeypark@sogang.ac.kr*

*<sup>f</sup>Department of Organic Materials Engineering, Chungnam National University, Daejeon  
34134, Republic of Korea. E-mail: junmokoo@cnu.ac.kr*

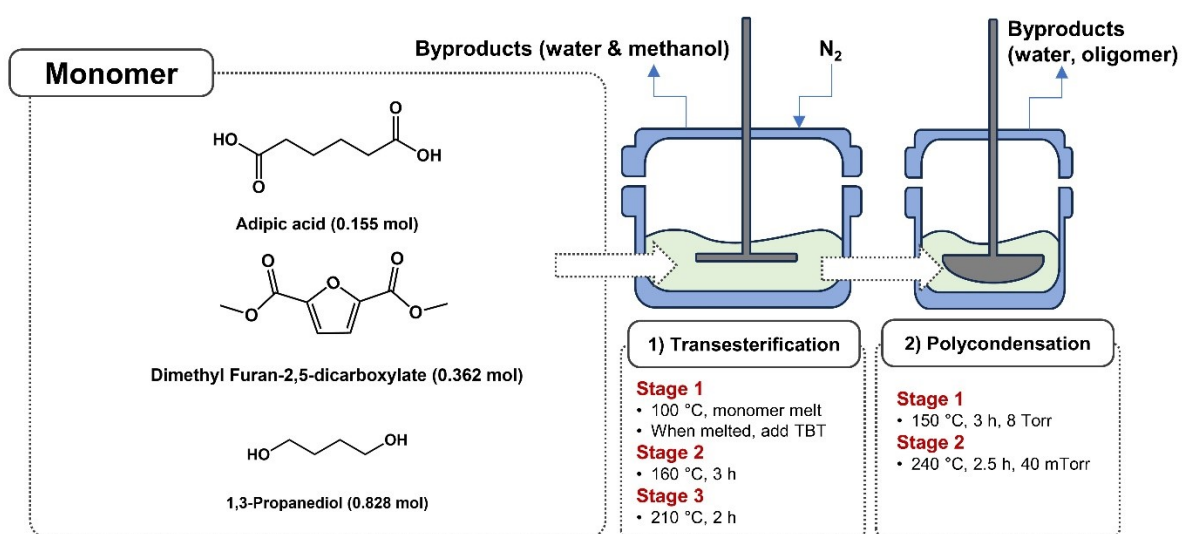

**Scheme S1.** Schematics of synthesis steps including transesterification and polycondensation.

**Table S1.** Characteristic properties of PPAFs polymerized with various feed ratios

| Sample code | Feed ratio<br>(Aro : Ali : PDO) <sup>a</sup> | PF / PA <sup>b</sup><br>(mol %) | M <sub>n</sub><br>(g mol <sup>-1</sup> ) | M <sub>w</sub><br>(g mol <sup>-1</sup> ) | PDI  |
|-------------|----------------------------------------------|---------------------------------|------------------------------------------|------------------------------------------|------|
| PPAF 90     | 9 : 1 : 16                                   | -                               | -                                        | -                                        | -    |
| PPAF 80     | 8 : 2 : 16                                   | 80.1 / 19.9                     | 34000                                    | 45000                                    | 1.32 |
| PPAF 70     | 7 : 3 : 16                                   | 68.2 / 31.8                     | 36000                                    | 47000                                    | 1.30 |
| PPAF 60     | 6 : 4 : 16                                   | 58.2 / 41.8                     | 31000                                    | 41000                                    | 1.34 |
| PPAF 50     | 5 : 5 : 16                                   | 50.7 / 49.3                     | 42500                                    | 53400                                    | 1.25 |

<sup>a</sup> : Aro. is DMFD as aromatic acidic monomer, and Ali. is AA as aliphatic acidic monomer.

<sup>b</sup> : The composition ratio of Furan-2,5-dicarboxylate and Adipic acid

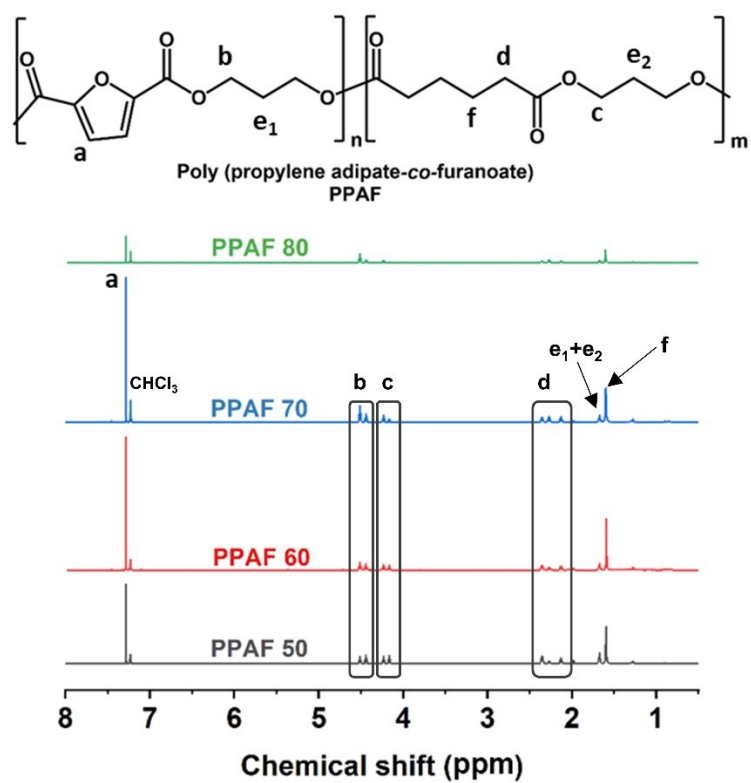

**Figure S1.** <sup>1</sup>H NMR spectra of PPAF copolyesters with various aromatic contents.

| Cycle | Strain (%)* |      |      |      |
|-------|-------------|------|------|------|
|       | 250         | 200  | 150  | 100  |
| 1     | 46.8        | 44.4 | 48.1 | 46.8 |
| 2     | 38.5        | 51.8 | 48.8 | 34.5 |
| 3     | 34.5        | 48.0 | 42.0 | 38.2 |
| 4     | 38.2        | 45.4 | 40.5 | 44.5 |
| 5     | 44.6        | 47.1 | 48.2 | 43.6 |
| 6     | 43.6        | 53.0 | 49.3 | 47.9 |
| 7     | 47.8        | 53.0 | 55.9 | 40.2 |
| 8     | 40.2        | 55.4 | 50.4 | 34.5 |
| 9     | 34.5        | 54.1 | 44.5 | 38.5 |
| 10    | 38.5        | 53.0 | 42.4 | 38.5 |

**Table S2.** Hysteresis data for PPAF 70 at specific strains

\* Recovery position according to the cycle for each strain. It is a position that contracts according to the cycle when pulled by each strain, and usually the position must increase as the cycle increases, but due to the structural specificity of PPAF 70, it shows a random position without a constant tendency.

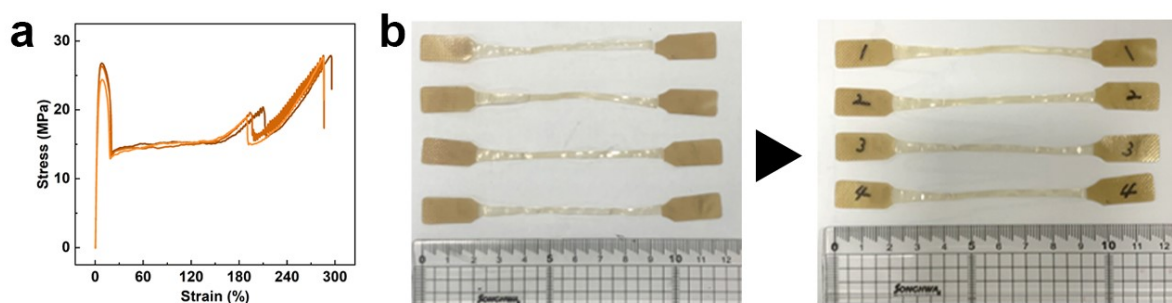

**Figure S2.** (a) Stress–strain curves for PPAT 70. (b) No change after elongation at break.

**Table S3.** Mechanical properties of PPAT 70

|         | Young's modulus<br>(MPa) | Tensile<br>Strength<br>(MPa) | Elongation at<br>break<br>(%) | Toughness<br>(MJ m <sup>-3</sup> ) |
|---------|--------------------------|------------------------------|-------------------------------|------------------------------------|
| 1       | 1040.2                   | 27.9                         | 293.7                         | 52.4                               |
| 2       | 950.2                    | 27.9                         | 284.5                         | 50.1                               |
| 3       | 821.9                    | 27.6                         | 284.5                         | 48.8                               |
| Average | 915.7                    | 27.8                         | 287.6                         | 50.4                               |

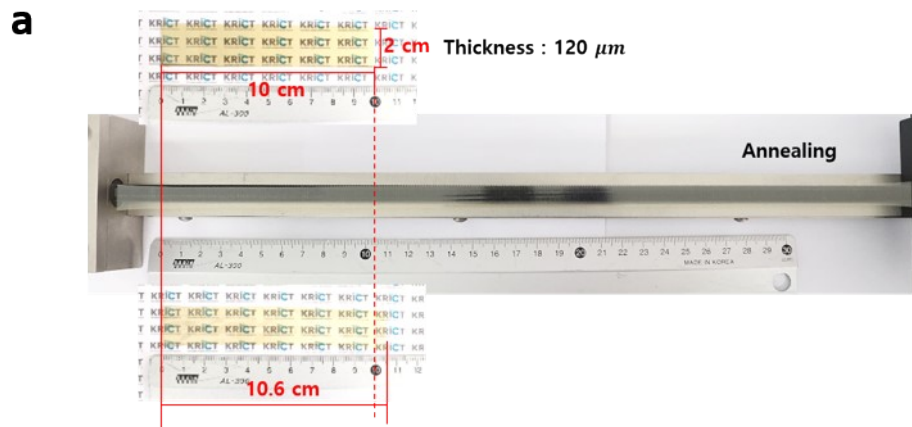

**b**

$$\text{Recovery rate (\%)} = \frac{L_i}{L_f} \times 100$$

$L_i$  : Initial sample length  
 $L_f$  : Final sample length after shrinkage

**Figure S3.** (a) Annealing when elongated by 600%, and recovery with a heating gun. (b) Equation of recovery rate.

**Table S4.** PPAF 70 recovery rate according to annealing time.

| Annealing time (h) | Strain (%) | Heating Temperature (°C) | Recover length (cm) | Recovery rate (%) | Thickness ( $\mu\text{m}$ ) |
|--------------------|------------|--------------------------|---------------------|-------------------|-----------------------------|
| 1                  |            |                          | 10.6                | 94.3              |                             |
| 3                  | 600        | 100                      | 11.5                | 87.0              | 120                         |
| 5                  |            |                          | 12.2                | 82.0              |                             |

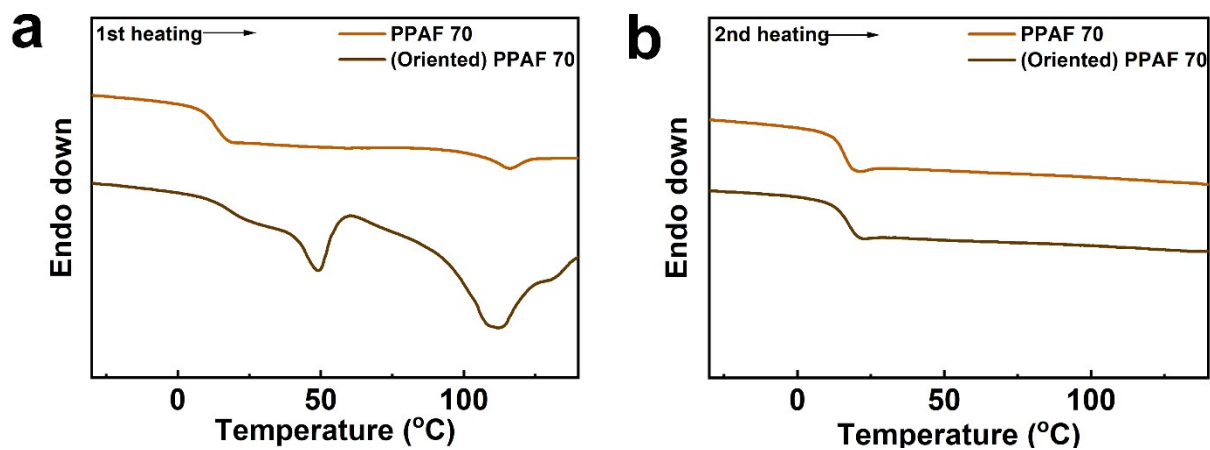

Figure. S4. DSC (a) 1<sup>st</sup> (b) 2<sup>nd</sup> heating curve of PPAF70 with neat and oriented sample.

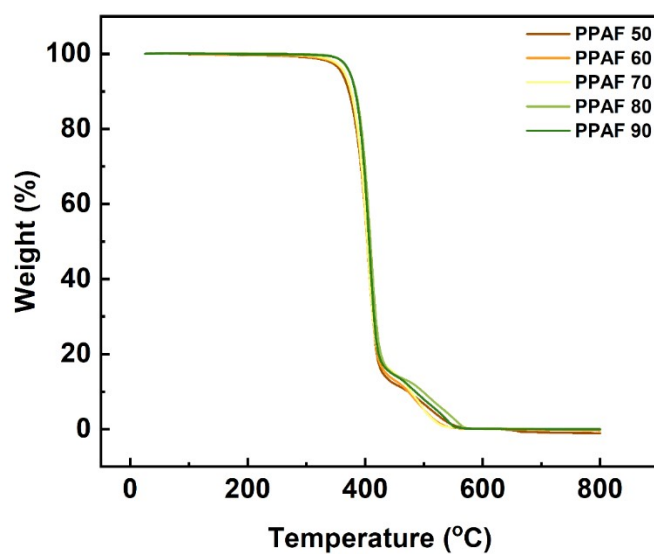

Figure S5. TGA curve of series of PPAFs under N<sub>2</sub> atmosphere.

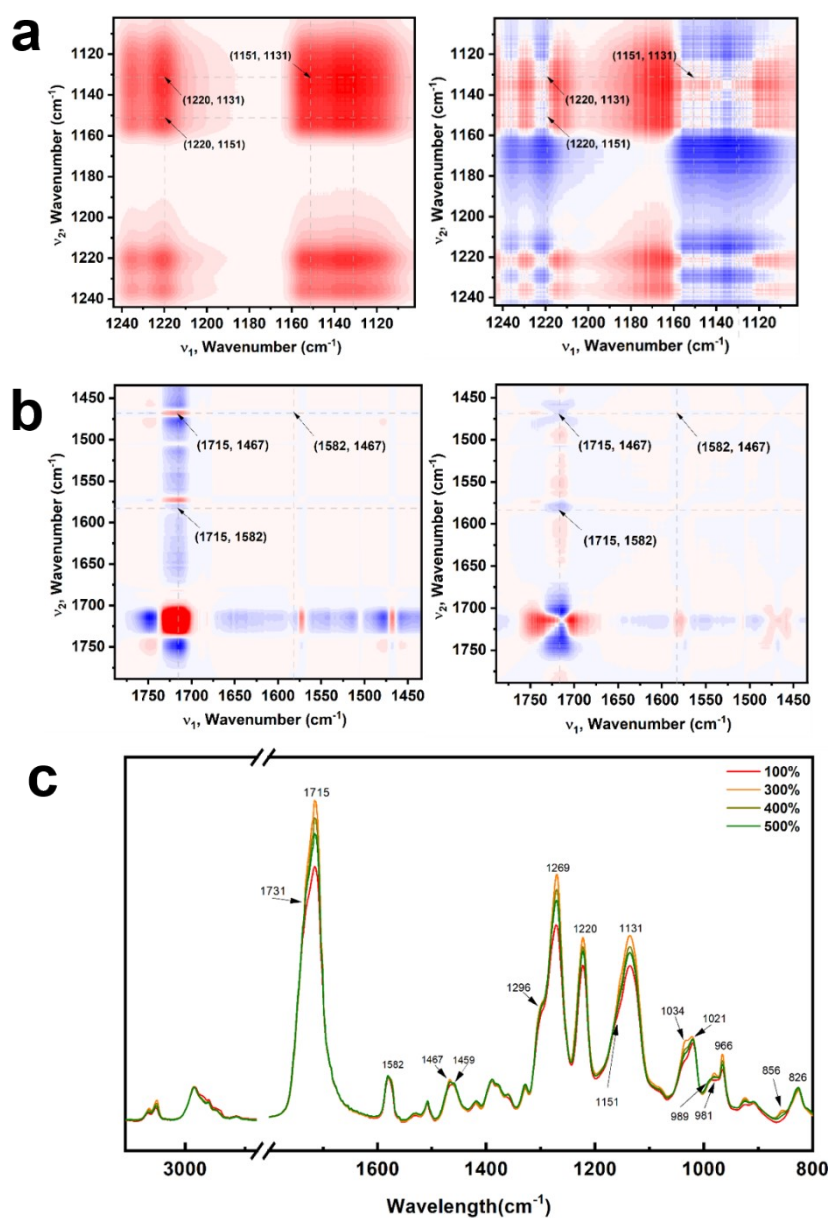

**Figure S6.** (a) Synchronous (left) and asynchronous (right) homogeneous 2DCOS spectra in the 1243–1102 cm<sup>-1</sup> range. (b) Synchronous (left) and asynchronous (right) homogeneous 2DCOS spectra in the 1788–1434 cm<sup>-1</sup> range (c) One dimensional FT-IR spectra of PPAF 70 when elongated between 300 and 500%.



**Table S5.** 2DCOS analysis of PPAF 70 when elongated between 300 and 500%, and

| Sequential order | Wavenumber (cm <sup>-1</sup> ) | Intensity change | Assignment                   |
|------------------|--------------------------------|------------------|------------------------------|
| a                | 1467                           | ▼                | -CH <sub>2</sub> - bending   |
| b                | 1731                           | ▼                | C=O from aliphatic segment   |
| c                | 1151                           | ▼                | C-O stretching               |
| d                | 1131                           | ▼                | C-O stretching               |
| e                | 1220                           | ▼                | =C-O-C= furan ring vibration |
| f                | 1715                           | ▼                | C=O adjacent to furan ring   |
| g                | 1582                           | ▲                | C=C furan ring stretching    |

corresponding sequences and intensity changes.

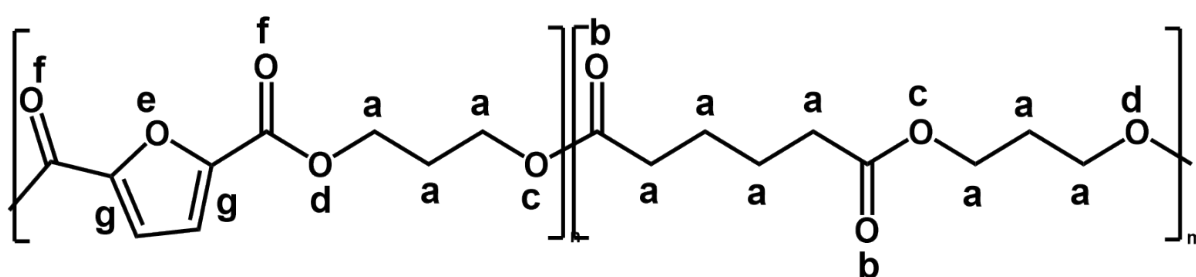

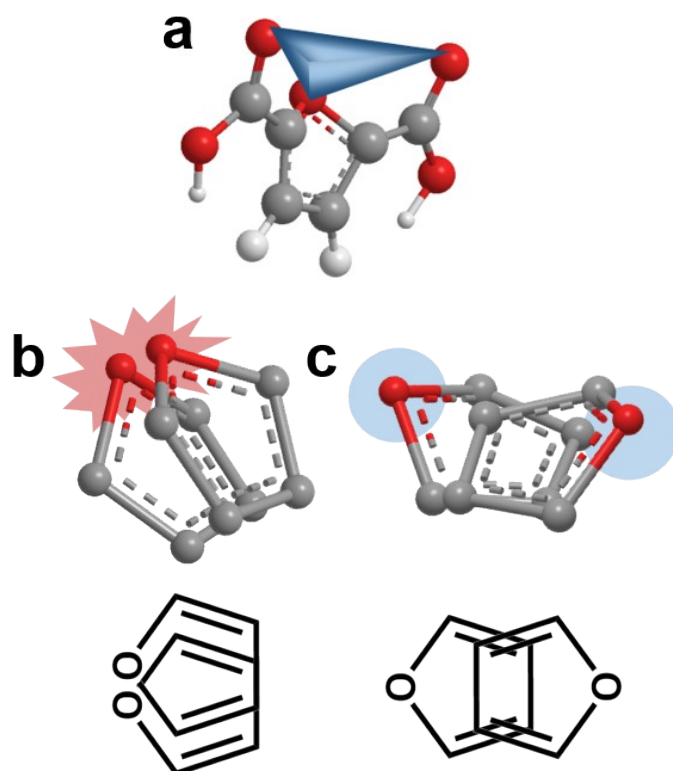

**Figure S7.** (a) Molecular structure of distorted FDCA. (b) Wrongly stacked furan rings: 3D (upper) and 2D (lower). (c) Correctly stacked furan rings: 3D (upper) and 2D (lower).

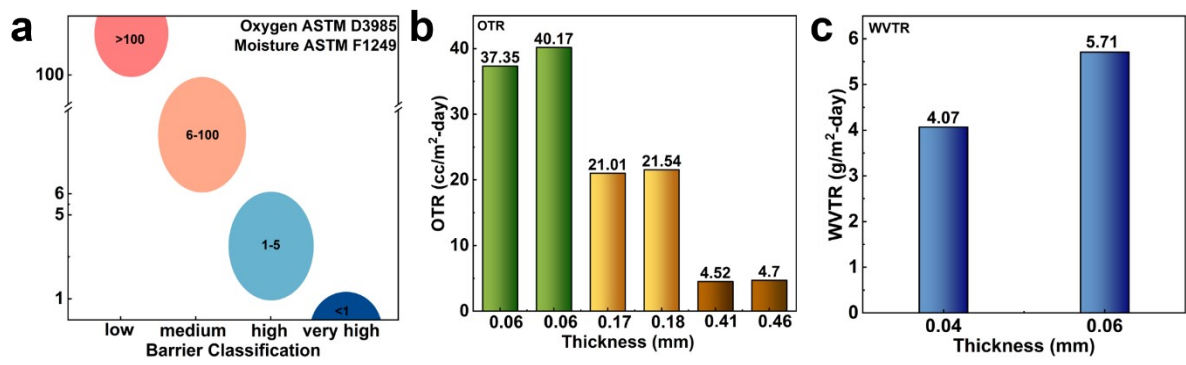

**Figure S8.** (a) Standard OTR and WVTR barrier classification values (ASTM D3985, ASTM F1249) (b) OTR value, and (c) WVTR value of PPAF 70 according to sample thickness.

**Movie S1.**
